# Supplementary material for: Predicting severe radiation pneumonitis in patients with locally- advanced non-small cell lung cancer after thoracic radiotherapy: Development and internal validation of a nomogram based on the clinical, hematological and dose–volume histogram parameters
Source: Research Square preprint supplement (doi:10.21203/rs.3.rs-4967531/v1), 2024-10-17
Supplement: Supplementary file 1 [file b83167bfcf4688e0f182c7cb.docx]

**Table 1**

Baseline characteristics of all patients (n=351)

| Characteristics | Number of patients (%) |
| --- | --- |
| Age(years), Median (IQR) | 65 (58-70) |
| Gender |  |
| Male | 284(80.9) |
| Female | 67(19.1) |
| EOCG PS  0  1  2  Smoking history  Yes  No  Lung disease  No  ILD  COPD  Emphysema  Surgery  Yes  No  FEV1%, Median (IQR)  DLCO%, Median (IQR)  Radiotherapy dose(cGy), Median (IQR)  Fractionation, Median (IQR) | 59(16.8)  271(77.2)  21(6.0)  171(48.7)  180(51.3)  226(64.4)  21(6.0)  17(4.8)  87(24.8)  94(26.8)  257(73.2)  85.1 (70.8-96.8)  91.9 (75.6-106.0)  5800 (5000-6000)  26 (25-30) |
| Chemotherapy regimen |  |
| No chemotherapy | 25(7.1) |
| Include TAX | 149(42.5) |
| Other regimens | 177(50.4) |
| Chemoradiotherapy |  |
| CCRT | 46(13.1) |
| SCRT | 280(79.8) |
| RT alone | 25(7.1) |
| GTV (cm3), Median (IQR) | 55.1 (28.5-102.6) |
| Total lung V5 (%), Median (IQR) | 37.8 (32.4-43.8) |
| Total lung V20 (%), Median (IQR) | 21.1 (17.8-24.1) |
| Total lung V30 (%), Median (IQR) | 15.0 (11.4-17.6) |
| Total lung MLD(cGy), Median (IQR) | 1112.5 (910.2-1250.1) |
| Contralateral lung V5 (%), Median (IQR) | 19.1 (12.7-25.6) |
| Contralateral lung V20 (%), Median (IQR) | 3.8 (1.0-7.9) |
| Contralateral lung V30 (%), Median (IQR) | 1.3 (0.1-3.8) |
| Contralateral lung MLD (cGy), Median (IQR) | 375.0 (263.8-536.9) |
| Ipsilateral lung V5 (%), Median (IQR) | 58.3 (50.3-68.3) |
| Ipsilateral lung V20 (%), Median (IQR) | 39.2 (33.2-46.2) |
| Ipsilateral lung V30 (%), Median (IQR) | 29.6 (23.5-35.3) |
| Ipsilateral lung MLD (cGy), Median (IQR) | 1891.3 (1585.6-2185.8) |
| Pre-RT Lymphocytes (106), Median (IQR) | 1.6 (1.2-2.0) |
| Pre-RT Monocytes (106), Median (IQR) | 0.5 (0.4-0.7) |
| Pre-RT Eosinophils (106), Median (IQR) | 0.1 (0.1-0.2) |
| Pre-RT NLR, Median (IQR) | 2.6 (1.8-3.7) |
| Pre-RT dNLR, Median (IQR) | 1.8 (1.3-2.5) |
| Pre-RT MLR, Median (IQR) | 0.3 (0.2-0.4) |
| Pre-RT dMLR, Median (IQR) | 0.4 (0.3-0.6) |
| Pre-RT SIRI (106), Median (IQR) | 1.3 (0.8-2.0) |
| Post-RT Lymphocytes (106), Median (IQR) | 0.8 (0.6-1.1) |
| Post-RT Monocytes (106), Median (IQR) | 0.5 (0.3-0.6) |
| Post-RT Eosinophils (106), Median (IQR) | 0.1 (0.1-0.2) |
| Post-RT NLR, Median (IQR) | 4.6 (3.1-6.9) |
| Post-RT dNLR, Median (IQR) | 2.5 (1.8-3.5) |
| Post-RT MLR, Median (IQR) | 0.5 (0.4-0.8) |
| Post-RT dMLR, Median (IQR) | 0.7 (0.5-1.1) |
| Post-RT SIRI (106), Median (IQR) | 2.0 (1.3-3.4) |

IQR, interquartile range; ECOG, Eastern Cooperative Oncology Group; PS, performance status; ILD, interstitial lung disease; COPD, chronic obstructive pulmonary disease; FEV1, forced expiratory volume in 1 second; DLCO, diffusing capacity of the lung for carbon monoxide; CCRT, concurrent chemoradiation therapy; SCRT, sequential chemoradiation therapy; GTV, gross target volume; Vx: the percentage of the lung volume that received more than x Gy, respectively; MLD: mean lung dose; NLR: neutrophil lymphocyte ratio; dNLR: derived neutrophil lymphocyte ratio; SIRI: systemic inflammation response index .
